# Supplementary material
Source: Springer Nature journal article supplement (https://www.springerprofessional.de/resource/supplementary/40192_2012_2_MOESM12_ESM.pdf/11899466)
Supplement: MOESM12 [file 11899466]

Likelihood of Occurrence

|             |            |          |               |                  |             |
|-------------|------------|----------|---------------|------------------|-------------|
| 5<br>(>70%) |            |          |               |                  |             |
| 4<br>(>50%) |            |          |               | 5                |             |
| 3<br>(>30%) |            | 3        | 1             | 5                |             |
| 2<br>(>5%)  |            | 3        | 1             | 2                |             |
| 1<br>(<5%)  |            |          |               |                  |             |
|             | 1<br>Minor | 2<br>Low | 3<br>Moderate | 4<br>Significant | 5<br>Severe |

Consequences (Increasing Severity >>)

- Low risk:** Monitor to ensure risk remains low.
- Medium Risk:** Aggressively manage. Consider alternatives or risk mitigation actions.
- High Risk:** Develop and implement alternative or concurrent approaches.

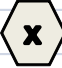

Risk Item: from table

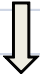

Effect of risk mitigation action.
